# Supplementary material for: Link-N: The missing link towards intervertebral disc repair is species-specific
Source: PubMed Central journal article supplement (PMC5679057; doi:10.1371/journal.pone.0187831), 2017-11-08
Supplement: pone.0187831.s002.pdf [file pone.0187831.s002.pdf]

**Supplementary File 2. The effect of human and canine (s)Link-N on GAG incorporation**

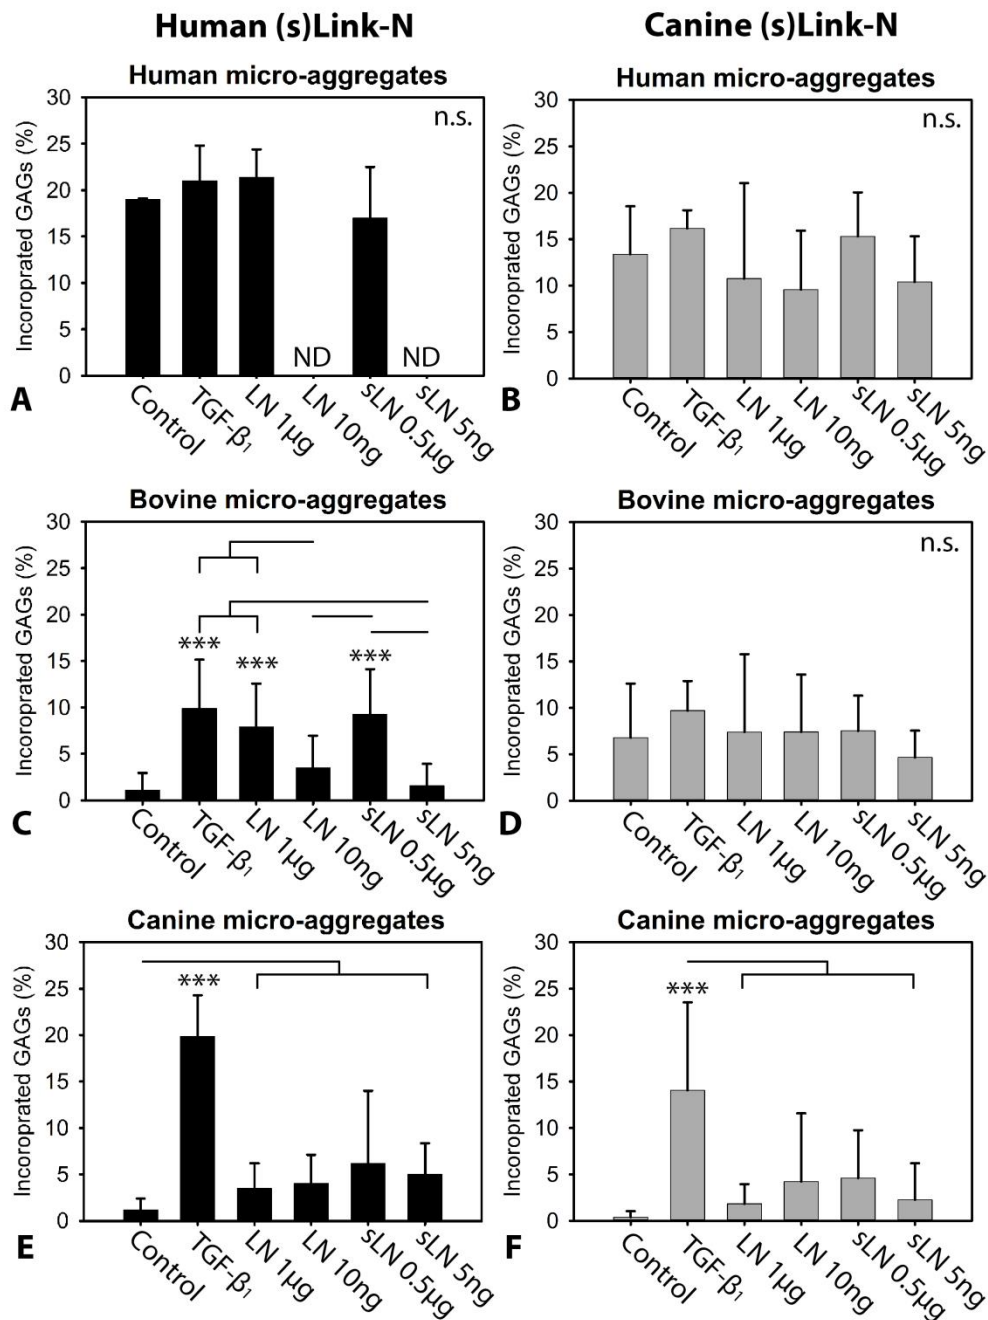

GAG incorporation ratio (mean + SD) of human, bovine, and CD canine CLC micro-aggregates treated with basal culture medium (control), supplemented with 10 ng/mL TGF- $\beta_1$  (positive control), 1  $\mu$ g/mL or 10 ng/mL human or canine Link-N (LN) or 0.5  $\mu$ g/mL or 5 ng/mL human or canine sLink-N (sLN). The CLC micro-aggregates were cultured for 28 days. GAG incorporation percentages were calculated as the GAG content of the micro-aggregate divided by the total amount of GAGs produced by that micro-aggregate (GAGs released in the culture medium + GAG content of the micro-aggregate). \*\*\*: significantly different from controls. Bars indicate significant differences between conditions ( $p < 0.05$ ).  $n = 3$ , (human) or 6 (bovine and canine), all in duplicates. ND: not determined, since GAG release was below the detection limit.
