# Supplementary material for: Link-N: The missing link towards intervertebral disc repair is species-specific
Source: PubMed Central journal article supplement (PMC5679057; doi:10.1371/journal.pone.0187831), 2017-11-08
Supplement: pone.0187831.s003.pdf [file pone.0187831.s003.pdf]

**Supplementary File 3. The effect of human (s)Link-N on CD canine CLCs in hypoxia vs. normoxia**

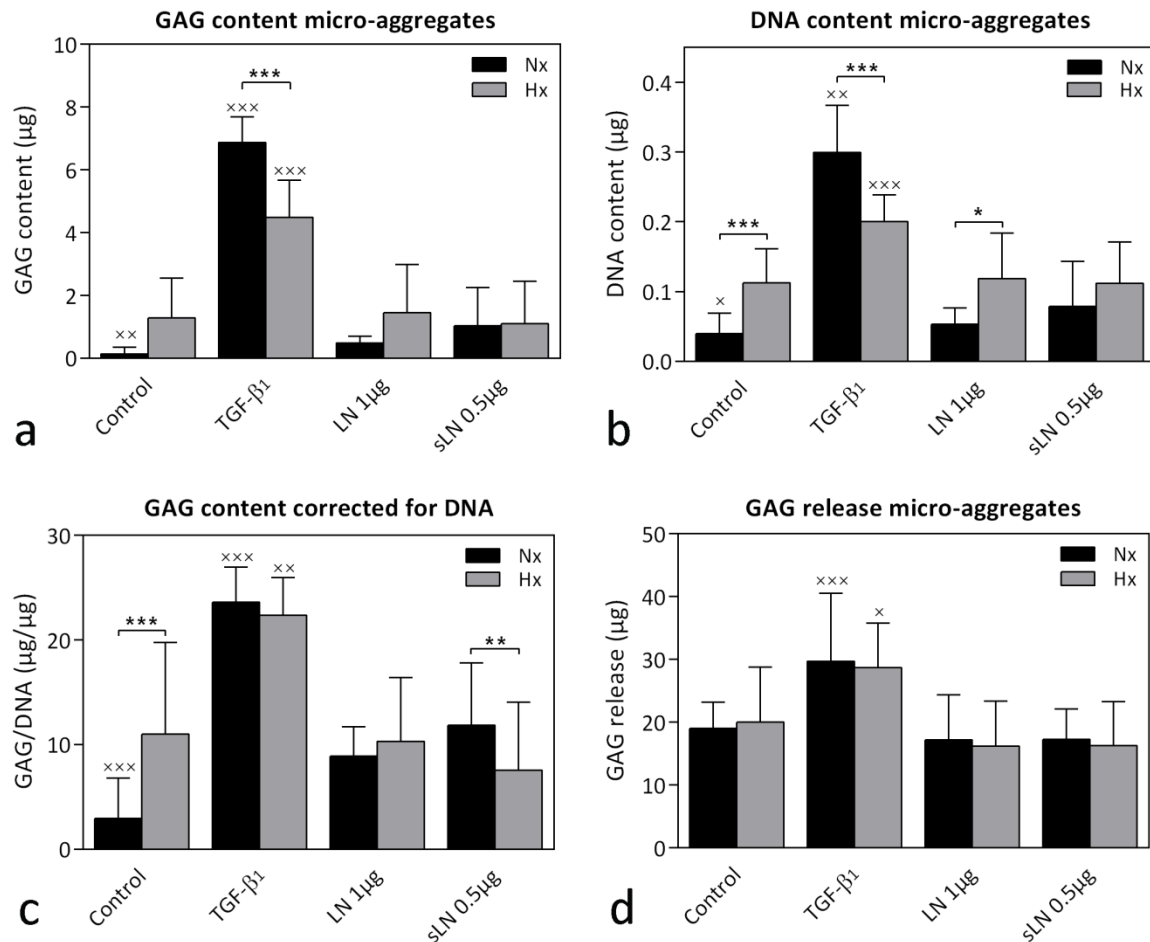

GAG and DNA content (mean + SD) of CD canine CLC micro-aggregates treated with basal culture medium (control), supplemented with 10 ng/mL TGF-β<sub>1</sub> (positive control), 1 μg/mL human Link-N (LN) or 0.5 μg/mL human sLink-N (sLN). The CLC micro-aggregates were cultured for 28 days in normoxia (Nx, 21% O<sub>2</sub>) or hypoxia (Hx, 5% O<sub>2</sub>). **(a)** GAG content **(b)** DNA content **(c)** GAG content corrected for DNA content **(d)** Total amount of GAGs released in the culture medium. \*  $p < 0.05$ , \*\*  $p < 0.01$ , \*\*\*  $p < 0.001$ . x, xx, xxx : significantly different ( $p < 0.05$ ,  $p < 0.01$ ,  $p < 0.001$  respectively) from all other conditions (growth factor treatment) in either Hx or Nx.  $n = 6$  (in duplicates).
