# Supplementary material for: Link-N: The missing link towards intervertebral disc repair is species-specific
Source: PubMed Central journal article supplement (PMC5679057; doi:10.1371/journal.pone.0187831), 2017-11-08
Supplement: pone.0187831.s004.pdf [file pone.0187831.s004.pdf]

**Supplementary File 4. The effect of human and canine (s)Link-N on non-chondrodystrophic canine CLCs**

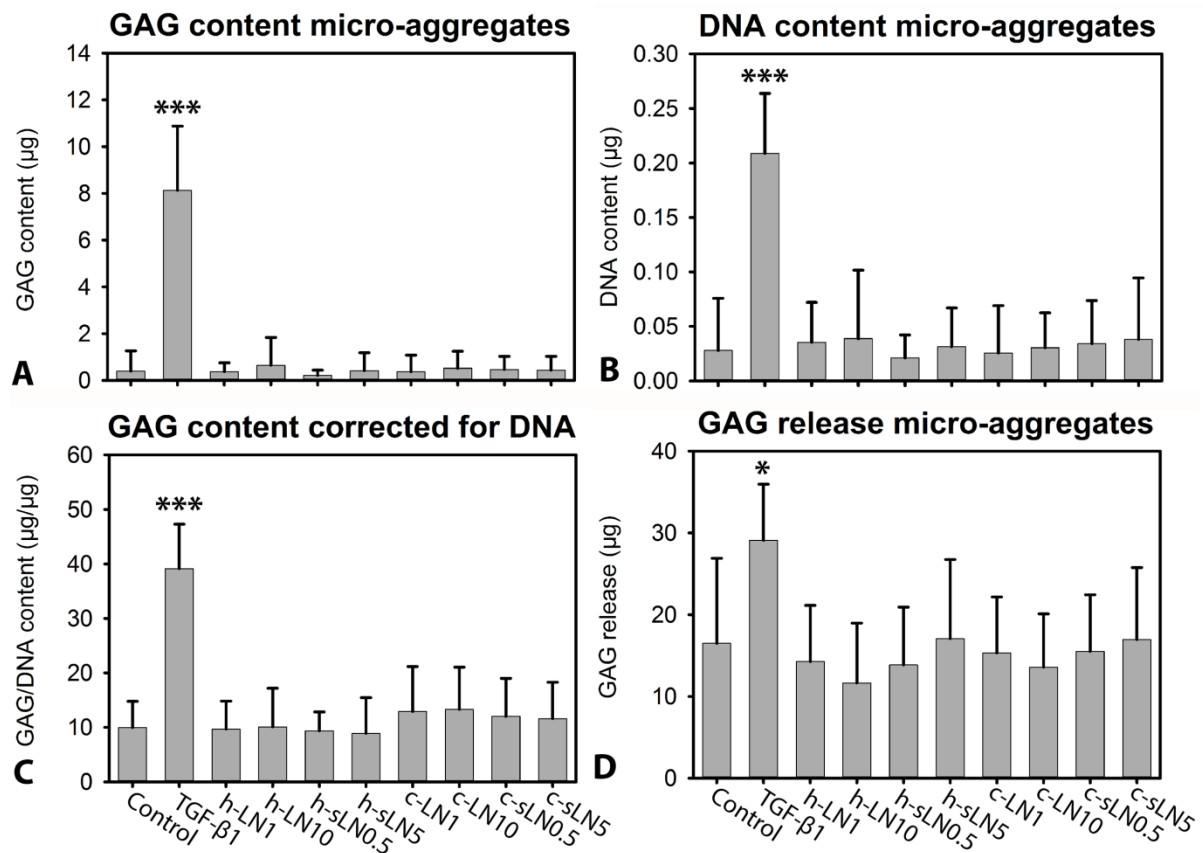

Effect of human and canine (short) Link-N on non-chondrodystrophic (NCD) canine chondrocyte-like cells (CLCs). The NCD canine CLC micro-aggregates were treated with basal culture medium (control), supplemented with 10 ng/mL TGF-β<sub>1</sub>, 1 µg/mL or 10 ng/mL canine or human Link-N (LN), or 0.5 µg/mL or 5 ng/mL human or canine short Link-N (sLN) for 28 days in hypoxia (5% O<sub>2</sub>). **(a)** GAG content, **(b)** DNA content, **(c)** GAG content corrected for DNA content, **(d)** total amount of GAGs released in the culture medium. \*, \*\*\*: significantly different from all other conditions ( $p < 0.05$ ,  $p < 0.001$ , respectively).  $n = 6$  (in duplicates).
